# Supplementary material for: Osteoimmunology: shared mechanisms and crosstalk between the immune and bone systems
Source: Springer Nature journal article supplement (doi:10.1038/nri2062), 2007-03-23
Supplement: 41577_2007_BFnri2062_MOESM1_ESM.pdf [file 41577_2007_BFnri2062_MOESM1_ESM.pdf]

Supplementary information S1  
List of bone phenotypes in mice deficient in osteoimmunoregulatory molecules

| Gene                                          | Bone resorption (osteoclast-mediated) |          | Bone formation (osteoblast-mediated) | Bone volume | References |
|-----------------------------------------------|---------------------------------------|----------|--------------------------------------|-------------|------------|
|                                               | Differentiation                       | Function |                                      |             |            |
| <b>Cytokines/secreted proteins</b>            |                                       |          |                                      |             |            |
| RANKL                                         | ↓                                     | –        | –                                    | ↑           | 1          |
| M-CSF ( <i>op/op</i> )                        | ↓                                     | –        | –                                    | ↑           | 2          |
| OPG                                           | ↑                                     | ↑        | –                                    | ↓           | 3          |
| IFNβ                                          | ↑                                     | –        | →                                    | ↓           | 4          |
| IL-6                                          | →                                     | –        | →                                    | →           | 5          |
|                                               | ↓*                                    | –        | –                                    | –           | 6          |
| IL-7                                          | ↑                                     | –        | →                                    | ↓           | 7          |
| <b>Receptors/channels/membrane factors</b>    |                                       |          |                                      |             |            |
| RANK                                          | ↓                                     | –        | –                                    | ↑           | 8          |
| cFMS                                          | ↓                                     | –        | –                                    | ↑           | 9          |
| DAPI2/FcRγ                                    | ↓                                     | ↓        | ↓                                    | ↑           | 10         |
| DC-STAMP                                      | ↓                                     | ↓        | –                                    | ↑           | 11         |
| plexin-A1                                     | ↓                                     | ↓        | →                                    | ↑           | 12         |
| β <sub>3</sub> -integrin                      | ↑                                     | ↓        | –                                    | ↑           | 13         |
| C1C7                                          | –                                     | ↓        | –                                    | ↑           | 14         |
| OSTM1 ( <i>gl/gl</i> )                        | ↓                                     | ↓        | –                                    | ↑           | 15         |
| ATP6I ( <i>oc/oc</i> )                        | →                                     | ↓        | →                                    | ↑           | 16         |
| IFNα/βR1                                      | ↑                                     | –        | →                                    | ↓           | 4          |
| IFNγR1                                        | ↑*                                    | –        | –                                    | –           | 17         |
| IL-1R1                                        | →                                     | –        | –                                    | →           | 18         |
|                                               | ↓*                                    | –        | –                                    | –           | 19         |
| TNFR1                                         | →                                     | –        | –                                    | →           | 18         |
| IL-11R                                        | ↓                                     | –        | ↓                                    | ↑           | 5          |
| CD44*                                         | ↑                                     | –        | ↑                                    | ↓           | 20         |
| gp130                                         | ↑                                     | –        | ↑                                    | ↓           | 21         |
| EPHB4**                                       | ↓                                     | ↓        | ↑                                    | ↑           | 22         |
| B7-H3                                         | –                                     | –        | ↓                                    | ↓           | 23         |
| RAGE                                          | ↓                                     | ↓        | –                                    | ↑           | 24         |
| <b>Adaptor/signalling molecules</b>           |                                       |          |                                      |             |            |
| TRAF6                                         | →                                     | ↓        | –                                    | ↑           | 25         |
|                                               | ↓                                     | –        | –                                    | ↑           | 26         |
| p62*                                          | ↓                                     | –        | –                                    | ↑           | 27         |
| GAB2                                          | ↓                                     | –        | →                                    | ↑           | 28         |
| STAT1                                         | ↑                                     | –        | ↑                                    | ↑           | 29         |
| SOCS1/3                                       | ↓*                                    | –        | –                                    | –           | 30         |
| SOCS3                                         | ↑                                     | –        | ↑                                    | ↓           | 31         |
| FHL2                                          | ↑*                                    | –        | –                                    | ↓           | 32         |
|                                               | →                                     | –        | ↓                                    | ↓           | 33         |
| MyD88                                         | ↓                                     | –        | ↓                                    | ↓           | 34         |
| BCL2                                          | ↓                                     | –        | –                                    | ↑           | 35         |
| VAV3                                          | ↑                                     | ↓        | –                                    | ↑           | 36         |
| <b>Kinases/phosphatases</b>                   |                                       |          |                                      |             |            |
| cSRC                                          | –                                     | ↓        | –                                    | ↑           | 37         |
|                                               | ↑                                     | –        | ↑                                    | ↑           | 38         |
| NIK                                           | ↓*                                    | –        | –                                    | →           | 39         |
| IKKβ                                          | ↓                                     | –        | ↓                                    | ↑           | 40         |
| IRAK-M                                        | ↑                                     | –        | ↑                                    | ↓           | 41         |
| SHP1 ( <i>me<sup>v</sup>/me<sup>v</sup></i> ) | ↑                                     | –        | –                                    | ↓           | 42         |
|                                               | ↑                                     | –        | ↓                                    | ↓           | 43         |
| SHIP1                                         | ↑                                     | ↑        | –                                    | ↓           | 44         |
| PLCγ2                                         | ↓                                     | ↓        | →                                    | ↑           | 45         |
| <b>Other enzymes</b>                          |                                       |          |                                      |             |            |
| cathepsin K                                   | →                                     | ↓        | –                                    | ↑           | 46         |
|                                               | ↑                                     | ↓        | ↑                                    | ↑           | 47         |
| TRAP                                          | →                                     | ↓        | ↓                                    | ↑           | 48         |
| <b>Transcription factors</b>                  |                                       |          |                                      |             |            |
| PU.1                                          | ↓                                     | –        | –                                    | ↑           | 49         |
| MITF ( <i>mi/mi</i> )                         | ↓                                     | –        | –                                    | ↑           | 50         |
| NF-κB p50/p52                                 | ↓                                     | –        | →                                    | ↑           | 51         |
| cFOS                                          | ↓                                     | –        | –                                    | ↑           | 52         |

|         |   |   |   |   |    |
|---------|---|---|---|---|----|
| FRA1    | → | → | ↓ | ↓ | 53 |
| JUNB    | ↓ | → | ↓ | ↓ | 54 |
| ATF4    | ↑ | - | ↓ | ↓ | 55 |
| RUNX2   | ↓ | - | ↓ | ↓ | 56 |
| CBFB    | - | - | ↓ | ↓ | 57 |
| OSTERIX | - | - | ↓ | ↓ | 58 |
| NFATc1  | ↓ | - | ↓ | ↑ | 59 |
| NFATc2  | → | → | ↓ | ↓ | 60 |
| SHN3    | → | → | ↑ | ↑ | 61 |
| EBF2    | ↑ | - | → | ↓ | 62 |
| PAX5    | ↑ | - | - | ↓ | 63 |
| p53     | ↑ | - | ↑ | ↑ | 64 |

\*analysed in models of inflammatory bone loss; \*\*data in transgenic mice; ↑, increased; ↓, decreased; -, not described or analysed; ( ), naturally occurring mutants. RANKL, receptor activator of nuclear factor-κB ligand; M-CSF, macrophage colony-stimulating factor; OPG, osteoprotegerin; IFN, interferon; IL, interleukin; DAP12, DNAX activation protein 12; FcRγ, Fc receptor common γ-subunit; DC-STAMP, dendritic cell-specific transmembrane protein; OSTM1, osteopetrosis associated transmembrane protein 1; EPHB4, ephrin receptor B4; RAGE, receptor for advanced glycation end products; TRAF6, tumour-necrosis factor-receptor-associated factor 6; GAB2, growth-factor-receptor-bound protein 2-associated binding protein 2; STAT1, signal transducer and activator of transcription 1; SOCS, suppressor of cytokine signalling; FHL2, four and a half LIM domain 2; MyD88, myeloid differentiation primary-response gene 88; BCL2, B-cell leukemia/lymphoma protein 2; NIK, nuclear factor-κB-inducing kinase; IKKβ, inhibitor of κB kinase β; IRAK-M, IL-1R-associated kinase M; SHP1, SH2 domain-containing protein tyrosine phosphatase 1; SHIP1, SH2 domain-containing inositol-5-phosphatase 1; PLC, phospholipase C; TRAP, tartrate-resistant acid phosphatase; MITF, microphthalmia-associated transcription factor; NF-κB, nuclear factor-κB; FRA1, FOS-related antigen 1; ATF4, activating transcription factor 4; RUNX2, RUNT-related transcription factor 2; CBFB, core-binding factor β; NFAT, nuclear factor of activated T cells; SHN3, Schnurri-3; EBF2, early B-cell factor 2.

## REFERENCES

1. Kong, Y.Y. *et al.* OPGL is a key regulator of osteoclastogenesis, lymphocyte development and lymph-node organogenesis. *Nature* **397**, 315-323 (1999).
2. Yoshida, H. *et al.* The murine mutation osteopetrosis is in the coding region of the macrophage colony stimulating factor gene. *Nature* **345**, 442-444 (1990).
3. Bucay, N. *et al.* *osteoprotegerin*-deficient mice develop early onset osteoporosis and arterial calcification. *Genes Dev.* **12**, 1260-1268 (1998).
4. Takayanagi, H. *et al.* RANKL maintains bone homeostasis through c-Fos-dependent induction of *interferon-β*. *Nature* **416**, 744-749 (2002).
5. Sims, N.A. *et al.* Interleukin-11 receptor signaling is required for normal bone remodeling. *J. Bone Miner. Res.* **20**, 1093-1102 (2005).
6. Wong, P.K. *et al.* Interleukin-6 modulates production of T lymphocyte-derived cytokines in antigen-induced arthritis and drives inflammation-induced osteoclastogenesis. *Arthritis Rheum.* **54**, 158-168 (2006).
7. Lee, S.K. *et al.* Interleukin-7 influences osteoclast function in vivo but is not a critical factor in ovariectomy-induced bone loss. *J. Bone Miner. Res.* **21**, 695-702 (2006).
8. Dougall, W.C. *et al.* RANK is essential for osteoclast and lymph node development. *Genes Dev.* **13**, 2412-2424 (1999).
9. Dai, X.M. *et al.* Targeted disruption of the mouse colony-stimulating factor 1 receptor gene results in osteopetrosis, mononuclear phagocyte deficiency, increased primitive progenitor cell frequencies, and reproductive defects. *Blood* **99**, 111-120 (2002).
10. Koga, T. *et al.* Costimulatory signals mediated by the ITAM motif cooperate with RANKL for bone homeostasis. *Nature* **428**, 758-763 (2004).
11. Yagi, M. *et al.* DC-STAMP is essential for cell-cell fusion in osteoclasts and foreign body giant cells. *J. Exp. Med.* **202**, 345-351 (2005).
12. Takegahara, N. *et al.* Plexin-A1 and its interaction with DAP12 in immune responses and bone homeostasis. *Nature Cell Biol.* **8**, 615-622 (2006).
13. McHugh, K.P. *et al.* Mice lacking  $\beta 3$  integrins are osteosclerotic because of dysfunctional osteoclasts. *J. Clin. Invest.* **105**, 433-440 (2000).
14. Kornak, U. *et al.* Loss of the *Clc-7* chloride channel leads to osteopetrosis in mice and man. *Cell* **104**, 205-215 (2001).
15. Chalhoub, N. *et al.* Grey-lethal mutation induces severe malignant autosomal recessive osteopetrosis in mouse and human. *Nature Med.* **9**, 399-406 (2003).
16. Li, Y.P., Chen, W., Liang, Y., Li, E. & Stashenko, P. *Atp6i*-deficient mice exhibit severe osteopetrosis due to loss of osteoclast-mediated extracellular acidification. *Nature Genet.* **23**, 447-451 (1999).
17. Takayanagi, H. *et al.* T cell-mediated regulation of osteoclastogenesis by signalling cross-talk between RANKL and IFN- $\gamma$ . *Nature* **408**, 600-605 (2000).
18. Vargas, S.J. *et al.* Interleukin-6 expression and histomorphometry of bones from mice deficient in receptors for interleukin-1 or tumor necrosis factor. *J. Bone Miner. Res.* **11**, 1736-1744 (1996).
19. Wei, S., Kitaura, H., Zhou, P., Ross, F.P. & Teitelbaum, S.L. IL-1 mediates TNF-induced osteoclastogenesis. *J. Clin. Invest.* **115**, 282-290 (2005).
20. Hayer, S. *et al.* CD44 is a determinant of inflammatory bone loss. *J. Exp. Med.* **201**, 903-914 (2005).

21. Sims, N.A. *et al.* Glycoprotein 130 regulates bone turnover and bone size by distinct downstream signaling pathways. *J. Clin. Invest.* **113**, 379-389 (2004).
22. Zhao, C. *et al.* Bidirectional ephrinB2-EphB4 signaling controls bone homeostasis. *Cell Metab.* **4**, 111-121 (2006).
23. Suh, W.K. *et al.* The immune regulatory protein B7-H3 promotes osteoblast differentiation and bone mineralization. *Proc. Natl Acad. Sci. USA* **101**, 12969-12973 (2004).
24. Zhou, Z. *et al.* Regulation of osteoclast function and bone mass by RAGE. *J. Exp. Med.* **203**, 1067-1080 (2006).
25. Lomaga, M.A. *et al.* TRAF6 deficiency results in osteopetrosis and defective interleukin-1, CD40, and LPS signaling. *Genes Dev.* **13**, 1015-1024 (1999).
26. Naito, A. *et al.* Severe osteopetrosis, defective interleukin-1 signalling and lymph node organogenesis in *TRAF6*-deficient mice. *Genes Cells* **4**, 353-362 (1999).
27. Durán, A. *et al.* The atypical PKC-interacting protein p62 is an important mediator of RANK-activated osteoclastogenesis. *Dev. Cell* **6**, 303-309 (2004).
28. Wada, T. *et al.* The molecular scaffold Gab2 is a crucial component of RANK signaling and osteoclastogenesis. *Nature Med.* **11**, 394-399 (2005).
29. Kim, S. *et al.* Stat1 functions as a cytoplasmic attenuator of Runx2 in the transcriptional program of osteoblast differentiation. *Genes Dev.* **17**, 1979-1991 (2003).
30. Ohishi, M. *et al.* Suppressors of cytokine signaling-1 and -3 regulate osteoclastogenesis in the presence of inflammatory cytokines. *J. Immunol.* **174**, 3024-3031 (2005).
31. Wong, P.K. *et al.* SOCS-3 negatively regulates innate and adaptive immune mechanisms in acute IL-1-dependent inflammatory arthritis. *J. Clin. Invest.* **116**, 1571-1581 (2006).
32. Bai, S. *et al.* FHL2 inhibits the activated osteoclast in a TRAF6-dependent manner. *J. Clin. Invest.* **115**, 2742-2751 (2005).
33. Günther, T. *et al.* Fhl2 deficiency results in osteopenia due to decreased activity of osteoblasts. *EMBO J.* **24**, 3049-3056 (2005).
34. Sato, N. *et al.* MyD88 but not TRIF is essential for osteoclastogenesis induced by lipopolysaccharide, diacyl lipopeptide, and IL-1 $\alpha$ . *J. Exp. Med.* **200**, 601-611 (2004).
35. McGill, G.G. *et al.* Bcl2 regulation by the melanocyte master regulator Mitf modulates lineage survival and melanoma cell viability. *Cell* **109**, 707-718 (2002).
36. Faccio, R. *et al.* Vav3 regulates osteoclast function and bone mass. *Nature Med.* **11**, 284-290 (2005).
37. Soriano, P., Montgomery, C., Geske, R. & Bradley, A. Targeted disruption of the *c-src* proto-oncogene leads to osteopetrosis in mice. *Cell* **64**, 693-702 (1991).
38. Marzia, M. *et al.* Decreased c-Src expression enhances osteoblast differentiation and bone formation. *J. Cell Biol.* **151**, 311-320 (2000).
39. Novack, D.V. *et al.* The I $\kappa$ B function of NF- $\kappa$ B2 p100 controls stimulated osteoclastogenesis. *J. Exp. Med.* **198**, 771-781 (2003).
40. Ruocco, M.G. *et al.* I $\kappa$ B kinase (IKK) $\beta$ , but not IKK $\alpha$ , is a critical mediator of osteoclast survival and is required for inflammation-induced bone loss. *J. Exp. Med.* **201**, 1677-1687 (2005).

41. Li, H. *et al.* IL-1 receptor-associated kinase M is a central regulator of osteoclast differentiation and activation. *J. Exp. Med.* **201**, 1169-1177 (2005).
42. Umeda, S. *et al.* Deficiency of SHP-1 protein-tyrosine phosphatase activity results in heightened osteoclast function and decreased bone density. *Am. J. Pathol.* **155**, 223-233 (1999).
43. Aoki, K. *et al.* The tyrosine phosphatase SHP-1 is a negative regulator of osteoclastogenesis and osteoclast resorbing activity: increased resorption and osteopenia in *me<sup>v</sup>/me<sup>v</sup>* mutant mice. *Bone* **25**, 261-267 (1999).
44. Takeshita, S. *et al.* SHIP-deficient mice are severely osteoporotic due to increased numbers of hyper-resorptive osteoclasts. *Nature Med.* **8**, 943-949 (2002).
45. Mao, D., Epple, H., Uthgenannt, B., Novack, D.V. & Faccio, R. PLC $\gamma$ 2 regulates osteoclastogenesis via its interaction with ITAM proteins and GAB2. *J. Clin. Invest.* **116**, 2869-2879 (2006).
46. Saftig, P. *et al.* Impaired osteoclastic bone resorption leads to osteopetrosis in cathepsin-K-deficient mice. *Proc. Natl Acad. Sci. USA* **95**, 13453-13458 (1998).
47. Li, C.Y. *et al.* Mice lacking cathepsin K maintain bone remodeling but develop bone fragility despite high bone mass. *J. Bone Miner. Res.* **21**, 865-875 (2006).
48. Hayman, A.R. *et al.* Mice lacking tartrate-resistant acid phosphatase (Acp 5) have disrupted endochondral ossification and mild osteopetrosis. *Development* **122**, 3151-3162 (1996).
49. Tondravi, M.M. *et al.* Osteopetrosis in mice lacking haematopoietic transcription factor PU.1. *Nature* **386**, 81-84. (1997).
50. Hodgkinson, C.A. *et al.* Mutations at the mouse microphthalmia locus are associated with defects in a gene encoding a novel basic-helix-loop-helix-zipper protein. *Cell* **74**, 395-404 (1993).
51. Franzoso, G. *et al.* Requirement for NF- $\kappa$ B in osteoclast and B-cell development. *Genes Dev.* **11**, 3482-3496. (1997).
52. Wang, Z.Q. *et al.* Bone and haematopoietic defects in mice lacking c-fos. *Nature* **360**, 741-745 (1992).
53. Eferl, R. *et al.* The Fos-related antigen Fra-1 is an activator of bone matrix formation. *EMBO J.* **23**, 2789-2799 (2004).
54. Kenner, L. *et al.* Mice lacking JunB are osteopenic due to cell-autonomous osteoblast and osteoclast defects. *J. Cell Biol.* **164**, 613-623 (2004).
55. Yang, X. *et al.* ATF4 is a substrate of RSK2 and an essential regulator of osteoblast biology; implication for Coffin-Lowry Syndrome. *Cell* **117**, 387-398 (2004).
56. Komori, T. *et al.* Targeted disruption of Cbfa1 results in a complete lack of bone formation owing to maturational arrest of osteoblasts. *Cell* **89**, 755-764 (1997).
57. Yoshida, C.A. *et al.* Core-binding factor  $\beta$  interacts with Runx2 and is required for skeletal development. *Nature Genet.* **32**, 633-638 (2002).
58. Nakashima, K. *et al.* The novel zinc finger-containing transcription factor osterix is required for osteoblast differentiation and bone formation. *Cell* **108**, 17-29 (2002).
59. Asagiri, M. *et al.* Autoamplification of NFATc1 expression determines its essential role in bone homeostasis. *J. Exp. Med.* **202**, 1261-1269 (2005).

60. Koga, T. *et al.* NFAT and Osterix cooperatively regulate bone formation. *Nature Med.* **11**, 880-885 (2005).
61. Jones, D.C. *et al.* Regulation of adult bone mass by the zinc finger adapter protein Schnurri-3. *Science* **312**, 1223-1227 (2006).
62. Kieslinger, M. *et al.* EBF2 regulates osteoblast-dependent differentiation of osteoclasts. *Dev. Cell* **9**, 757-767 (2005).
63. Horowitz, M.C. *et al.* Pax5-deficient mice exhibit early onset osteopenia with increased osteoclast progenitors. *J. Immunol.* **173**, 6583-6591 (2004).
64. Wang, X. *et al.* p53 functions as a negative regulator of osteoblastogenesis, osteoblast-dependent osteoclastogenesis, and bone remodeling. *J. Cell Biol.* **172**, 115-125 (2006).
